# Supplementary material for: Plastid Phylogenomic Analyses Reveal the Taxonomic Position of Peucedanum franchetii
Source: MDPI journal article supplement (doi:10.3390/plants12010097), 2022-12-24
Supplement: s1 [file s1]

**Table S2. List of unique genes identified in plastomes of *P. franchetii***

| Category of Genes         | Group of gene                     | Name of gene                                                                                                                                                                                                                                                                                                            |
|---------------------------|-----------------------------------|-------------------------------------------------------------------------------------------------------------------------------------------------------------------------------------------------------------------------------------------------------------------------------------------------------------------------|
| Self-replication          | Ribosomal RNA genes               | <i>rrn4.5, rrn5, rrn16, rrn23</i>                                                                                                                                                                                                                                                                                       |
|                           | Transfer RNA genes                | <i>trnC-GCA, trnD-GUC, trnE-UUC, trnF-GAA, trnG-GCC, trnG-UCC*, trnH-GUG, trnI-CAU, trnK-UUU*, trnL-CAA, trnL-UAA*, trnL-UAG, trnM-CAU, trnP-UGG, trnQ-UUG, trnR-UCU, trnS-GCU, trnS-GGA, trnS-UGA, trnT-UGU, trnT-GGU, trnV-GAC, trnV-UAC*, trnY-GUA, trnW-CCA, trnM-CAU, trnA-UGC*, trnI-GAU*, trnN-GUU, trnR-ACG</i> |
|                           | Ribosomal protein (small subunit) | <i>rps2, rps3, rps4, rps7, rps8, rps11, rps12**, rps14, rps15, rps16*, rps18, rps19</i>                                                                                                                                                                                                                                 |
|                           | Ribosomal protein (large subunit) | <i>rpl2*, rpl14, rpl16*, rpl20, rpl22, rpl23, rpl32, rpl33, rpl36</i>                                                                                                                                                                                                                                                   |
|                           | RNA polymerase                    | <i>rpoA, rpoB, rpoC1*, rpoC2</i>                                                                                                                                                                                                                                                                                        |
|                           | Translational initiation factor   | <i>infA</i>                                                                                                                                                                                                                                                                                                             |
|                           |                                   |                                                                                                                                                                                                                                                                                                                         |
| Genes for photosynthesis  | Subunits of photosystem I         | <i>psaA, psaB, psaC, psaI, psaJ, ycf3**, ycf4</i>                                                                                                                                                                                                                                                                       |
|                           | Subunits of photosystem II        | <i>psbA, psbB, psbC, psbD, psbE, psbF, psbH, psbI, psbJ, psbK, psbL, psbM, psbN, psbT, psbZ</i>                                                                                                                                                                                                                         |
|                           | Subunits of cytochrome            | <i>petA, petB*, petD*, petG, petL, petN</i>                                                                                                                                                                                                                                                                             |
|                           | Subunits of ATP synthase          | <i>atpA, atpB, atpE, atpF*, atpH, atpI</i>                                                                                                                                                                                                                                                                              |
|                           | Large subunit of Rubisco          | <i>rbcL</i>                                                                                                                                                                                                                                                                                                             |
|                           | Subunits of NADH dehydrogenase    | <i>ndhA*, ndhB*, ndhC, ndhD, ndhE, ndhF, ndhG, ndhH, ndhI, ndhJ, ndhK</i>                                                                                                                                                                                                                                               |
|                           |                                   |                                                                                                                                                                                                                                                                                                                         |
| Other genes               | Maturase                          | <i>matK</i>                                                                                                                                                                                                                                                                                                             |
|                           | Envelope membrane protein         | <i>cemA</i>                                                                                                                                                                                                                                                                                                             |
|                           | Subunit of acetyl-CoA             | <i>accD</i>                                                                                                                                                                                                                                                                                                             |
|                           | Synthesis gene                    | <i>ccsA</i>                                                                                                                                                                                                                                                                                                             |
|                           | ATP-dependent protease            | <i>clpP**</i>                                                                                                                                                                                                                                                                                                           |
|                           | Component of TIC complex          | <i>ycf1</i>                                                                                                                                                                                                                                                                                                             |
| Genes of unknown function | Conserved open reading frames     | <i>ycf2</i>                                                                                                                                                                                                                                                                                                             |
|                           |                                   |                                                                                                                                                                                                                                                                                                                         |

\*: Gene with one intron

\*\*: Gene with two introns.
